# Supplementary material for: Emotion Recognition in Cats
Source: PubMed Central journal article supplement (PMC7401521; doi:10.3390/ani10071107), 2020-06-28
Supplement: animals-10-01107-s001.pdf [file animals-10-01107-s001.pdf]

## **Supplementary Information**

**Title of Manuscript:**

**Emotion Recognition in Cats**

**Authors:**

**Angelo Quaranta \*, Serenella d'Ingeo, Rosaria Amoruso and Marcello Siniscalchi**

Department of Veterinary Medicine, Animal Physiology and Behavior Unit, University of Bari "Aldo Moro", 70121 Bari, Italy; serenella.dingeo@uniba.it (S.d.); rosy.amoruso@gmail.com (R.A.); marcello.siniscalchi@uniba.it (M.S.)

\*Correspondence: angelo.quaranta@uniba.it, Tel.: +39-080-544-3927

| Behavioral Category | Scored Behavior                                                                                                                                                                                                                                                                                                                                                                       |
|---------------------|---------------------------------------------------------------------------------------------------------------------------------------------------------------------------------------------------------------------------------------------------------------------------------------------------------------------------------------------------------------------------------------|
| Stress/Anxiety      | ears held in tension<br>slightly spatulate tongue<br>tongue way out<br>braced legs<br>tail down-tucked<br>panting<br>salivating<br>look away of avoidance<br>flattended ears<br>head lowered<br>paw lifted<br>lowering of the body posture<br>vocalization<br>shaking of the body<br>running away<br>hiding<br>freezing<br>seeking attention from the owner<br>head turn<br>turn away |

**Supplementary Table 1.** List of behaviors scored according to the Stress/Anxiety category [1].

## References

1. Bradshaw, J.W. The Behaviour of the Domestic Cat; Cabi: Wallingford, Oxfordshire, UK, 2012. ISBN 1845939921.
